# Supplementary material
Source: MDPI journal article supplement (https://www.mdpi.com/2076-0760/10/8/283)
Supplement: s1 [file s1]

*Sample Demographics by average*

|                                                                                          |                     |
|------------------------------------------------------------------------------------------|---------------------|
| Demographics                                                                             | (N = 103,056)       |
| <b>Crime (Uniform Crime Reporting Program, FBI)</b>                                      |                     |
| Violent Crime                                                                            | 127± 854            |
| Property Crime                                                                           | 859 ± 3,895         |
| <b>Student Expenditure (Annual Survey of School System Finances)</b>                     |                     |
| Student Expenditure                                                                      | 9,980 ± 3,170       |
| <b>Population (Decennial census: 2000, 2010; Population Estimates Program)</b>           |                     |
| Population                                                                               | 23,372 ±<br>100,032 |
| <b>Population Density</b>                                                                |                     |
| Population Density                                                                       | 2,082 ± 2,340       |
| <b>Wealth</b>                                                                            |                     |
| Per Capita Income (Decennial: 2000; ACS 5-year estimates)                                | 24,357 ± 11,885     |
| Median Income (Decennial: 2000; ACS 5-year estimates)                                    | 24,942 ± 9,062      |
| Median Gross Rent (Decennial: 2000; ACS 5-year estimates)                                | 794 ± 3745          |
| Proportion Children in Poverty (Small Area Income and Poverty Estimates, SAIPE, Program) | 0.18 ± 0.09         |
| Unemployment Rate (Decennial: 2000; ACS 5-year estimates)                                | 7.49 ± 4.36         |
| <b>Race (Decennial: 2000; ACS 5-year estimates)</b>                                      |                     |
| Asian                                                                                    | 0.01 ± 0.04         |
| Black or African American                                                                | 0.08 ± 0.17         |
| Caucasion                                                                                | 0.80 ± 0.20         |
| <b>Education Attainment (Decennial: 2000; ACS 5-year estimates)</b>                      |                     |
| Did not graduate highschool                                                              | 0.14 ± 0.10         |
| Graduated highschool                                                                     | 0.29 ± 0.13         |
| Some College                                                                             | 0.26 ± 0.11         |
| Bachelors                                                                                | 0.13 ± 0.09         |
| Masters or greater                                                                       | 0.08 ± 0.07         |
| <b>Law Enforcement (US Department of Justice and FBI, LEOKA police employee data)</b>    |                     |
| Total Officers                                                                           | 47 ± 237            |
| <b>Voting History (MIT Election Data + Science Lab)</b>                                  |                     |
| Political Preference                                                                     | -0.13 ± 0.29        |

Sample demographics are taken over the 16-year period (2003-2018); We do not include CRDC data given that it was limited to three time points (for student chronic absenteeism and teacher absenteeism) and only 8000 datapoints for teacher retention.
