# Supplementary material
Source: MDPI journal article supplement (https://www.mdpi.com/2076-0760/10/8/283)

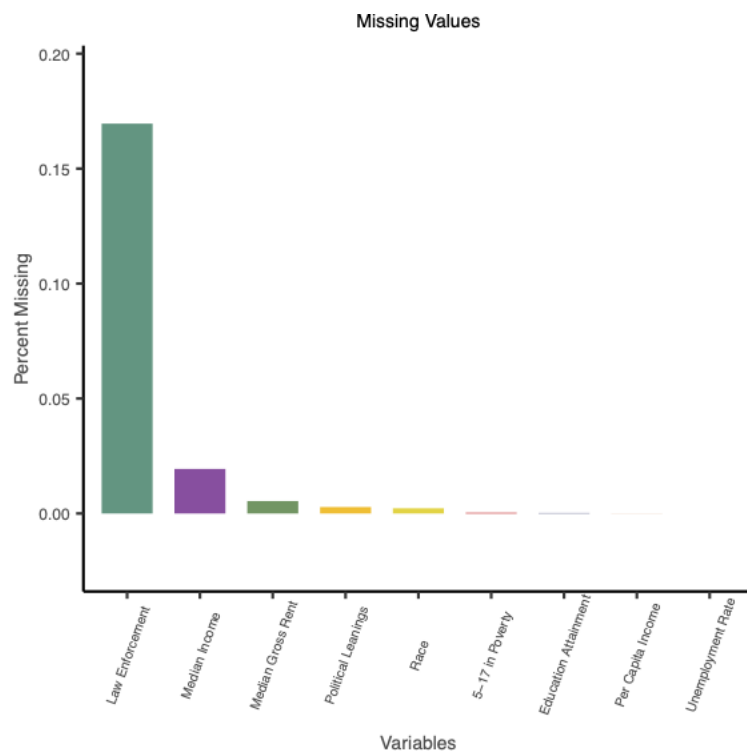

Variables with missing values.

Supplement: s1 [file s1]
